# Supplementary material
Source: PubMed Central journal article supplement (PMC5705385)
Supplement: NIHMS904404-supplement-2.pdf [file NIHMS904404-supplement-2.pdf]

## Life Sciences Reporting Summary

Nature Research wishes to improve the reproducibility of the work that we publish. This form is intended for publication with all accepted life science papers and provides structure for consistency and transparency in reporting. Every life science submission will use this form; some list items might not apply to an individual manuscript, but all fields must be completed for clarity.

For further information on the points included in this form, see Reporting Life Sciences Research. For further information on Nature Research policies, including our data availability policy, see Authors & Referees and the Editorial Policy Checklist.

### ► Experimental design

#### 1. Sample size

Describe how sample size was determined.

All experiments were performed with at least three independent biological replicates. Three technical replicates were included for each sample point. Each value shown in figures was presented as the mean value of the biological replicates, with standard deviation shown as error bars. At least 5 time points were chosen for each kinetic experiment to cover a wide range. p-values were not presented, since our data sought kinetic trends having greater than 10-fold differences in cell survival at multiple time points and qualitative differences in microscopic images and flow cytometry profiles.

#### 2. Data exclusions

Describe any data exclusions.

No exclusion.

#### 3. Replication

Describe whether the experimental findings were reliably reproduced.

All attempts at replication were successful.

#### 4. Randomization

Describe how samples/organisms/participants were allocated into experimental groups.

For microscopy assays, more than 200 cells from each experimental group were randomly selected for determination of the percentage of cells having DNA breaks.

#### 5. Blinding

Describe whether the investigators were blinded to group allocation during data collection and/or analysis.

No blinding was carried out, since our experiments do not involve animals or human subjects. Moreover, the E. coli cultures used in our work have different genotypes and they need to be grown/treated with different conditions, which makes blinding difficult and unnecessary.

Note: all studies involving animals and/or human research participants must disclose whether blinding and randomization were used.

## 6. Statistical parameters

For all figures and tables that use statistical methods, confirm that the following items are present in relevant figure legends (or in the Methods section if additional space is needed).

n/a Confirmed

- The exact sample size ( $n$ ) for each experimental group/condition, given as a discrete number and unit of measurement (animals, litters, cultures, etc.)
- A description of how samples were collected, noting whether measurements were taken from distinct samples or whether the same sample was measured repeatedly
- A statement indicating how many times each experiment was replicated
- The statistical test(s) used and whether they are one- or two-sided (note: only common tests should be described solely by name; more complex techniques should be described in the Methods section)
- A description of any assumptions or corrections, such as an adjustment for multiple comparisons
- The test results (e.g.  $P$  values) given as exact values whenever possible and with confidence intervals noted
- A clear description of statistics including central tendency (e.g. median, mean) and variation (e.g. standard deviation, interquartile range)
- Clearly defined error bars

*See the web collection on statistics for biologists for further resources and guidance.*

## ► Software

Policy information about availability of computer code

### 7. Software

Describe the software used to analyze the data in this study.

Flow cytometry data were analyzed by the BD Accuri C6 software and then were exported to FlowJo for figure preparation. Images from microscopy were captured by the NIS Elements BR imaging software or OpenLab. Images were then cropped using Photoshop for showing representative bacterial cells. Standard deviations and standard errors were analyzed by Origin. All panels were arranged into figures in Adobe Illustrator.

For manuscripts utilizing custom algorithms or software that are central to the paper but not yet described in the published literature, software must be made available to editors and reviewers upon request. We strongly encourage code deposition in a community repository (e.g. GitHub). *Nature Methods* guidance for providing algorithms and software for publication provides further information on this topic.

## ► Materials and reagents

Policy information about availability of materials

### 8. Materials availability

Indicate whether there are restrictions on availability of unique materials or if these materials are only available for distribution by a for-profit company.

No unique materials were used. No restriction on availability of all materials used in this study.

### 9. Antibodies

Describe the antibodies used and how they were validated for use in the system under study (i.e. assay and species).

NA

### 10. Eukaryotic cell lines

a. State the source of each eukaryotic cell line used.

NA

b. Describe the method of cell line authentication used.

NA

c. Report whether the cell lines were tested for mycoplasma contamination.

NA

d. If any of the cell lines used are listed in the database of commonly misidentified cell lines maintained by ICLAC, provide a scientific rationale for their use.

NA

## ► Animals and human research participants

---

Policy information about studies involving animals; when reporting animal research, follow the ARRIVE guidelines

### 11. Description of research animals

Provide details on animals and/or animal-derived materials used in the study.

NA

Policy information about studies involving human research participants

### 12. Description of human research participants

Describe the covariate-relevant population characteristics of the human research participants.

NA
